# Supplementary material for: Gene expression signatures in blood from a West African sepsis cohort define host response phenotypes
Source: PubMed Central journal article supplement (PMC11139862; doi:10.1038/s41467-024-48821-0), 2024-05-30
Supplement: 41467_2024_48821_MOESM3_ESM.pdf [file 41467_2024_48821_MOESM3_ESM.pdf]

## **Description of Additional Supplementary Files**

- Supplementary Data 1** Summary and statistics related to the Healthy and Sepsis cohorts used throughout the study. Sheet 1 - entire cohort compared by gender. Sheet 2 - sepsis cohort with known 28-day mortality compared by 28-day mortality.
- Supplementary Data 2** Sheet 1 - summary of the sample counts used in different analyses in manuscript. Sheet 2 - information about the source data for each figure.
